# Supplementary material for: Depsidone Derivatives and a Cyclopeptide Produced by Marine Fungus Aspergillus unguis under Chemical Induction and by Its Plasma Induced Mutant
Source: MDPI journal article supplement (doi:10.3390/molecules23092245), 2018-09-03
Supplement: s1 [file s1]

# Supplementary Materials: Depsidone Derivatives and a Cyclopeptide Produced by Marine Fungus *Aspergillus unguis* under Chemical Induction and by Its Plasma Induced Mutant

Wen-Cong Yang, Hai-Yan Bao, Ya-Yue Liu, Ying-Ying Nie, Jing-Ming Yang, Peng-Zhi Hong, and Yi Zhang

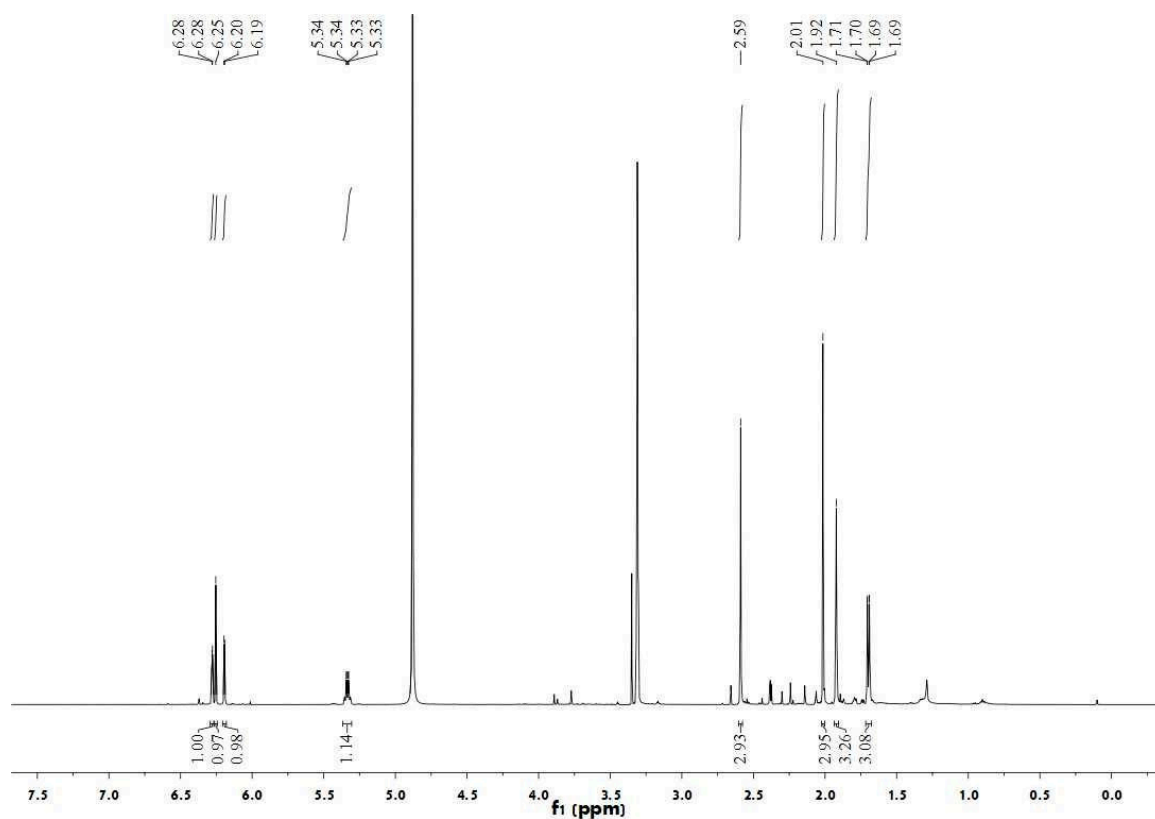

Figure S1. 500 MHz for <sup>1</sup>H NMR Spectrum of 1 in CD<sub>3</sub>OD.

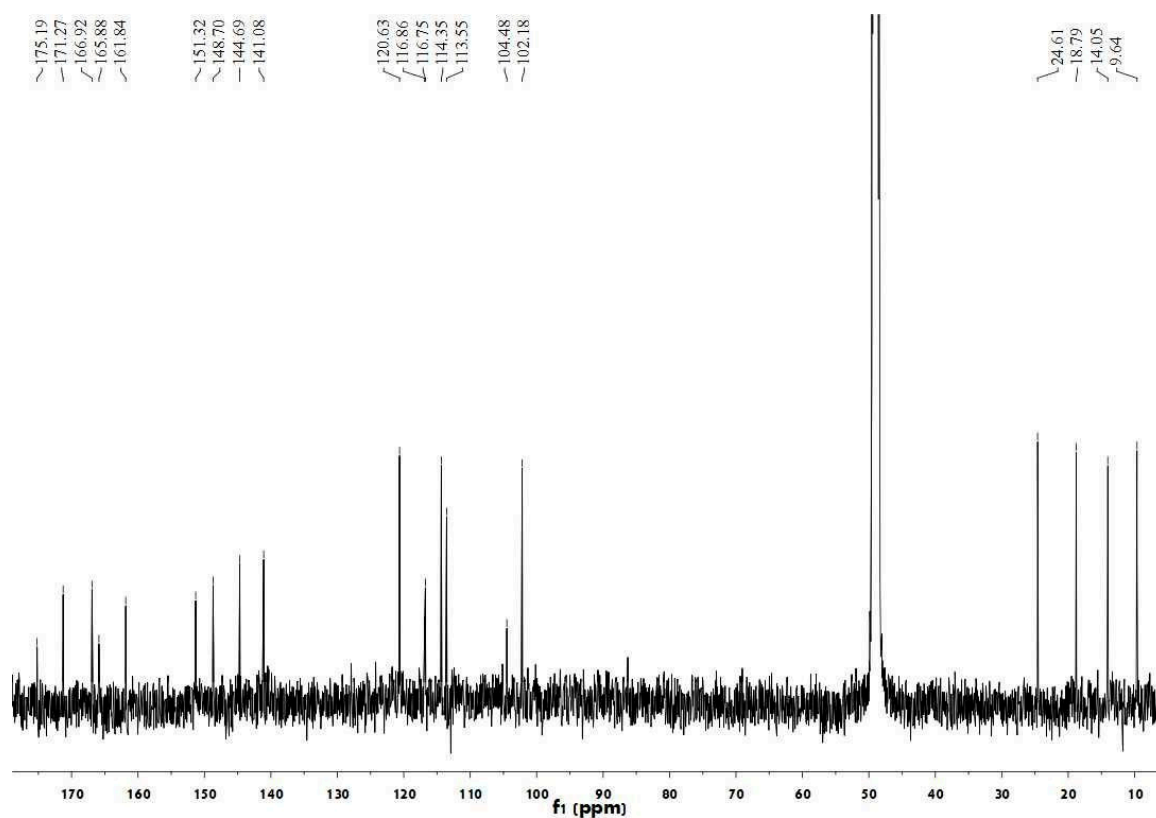

Figure S2. 125 MHz for  $^{13}\text{C}$  NMR Spectrum of **1** in  $\text{CD}_3\text{OD}$ .

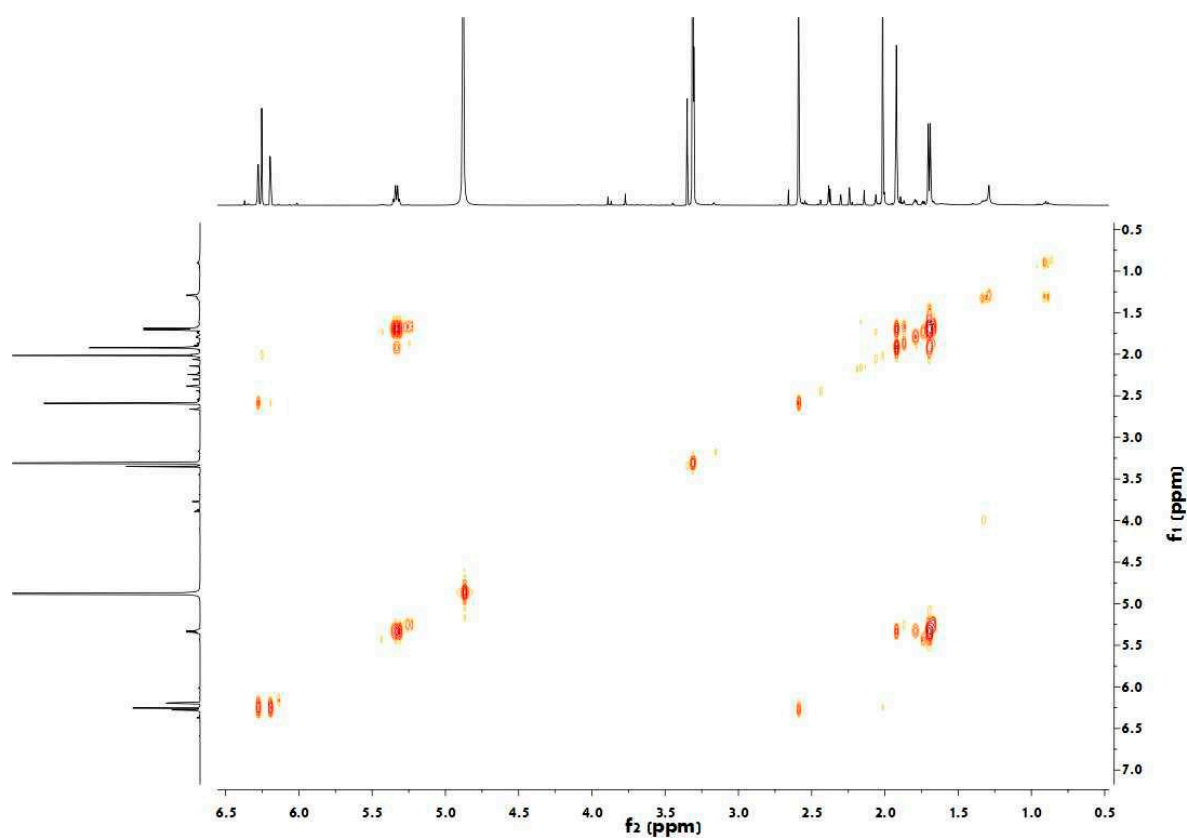

Figure S3. 500 MHz for  $^1\text{H}$ - $^1\text{H}$  COSY Spectrum of **1** in  $\text{CD}_3\text{OD}$ .

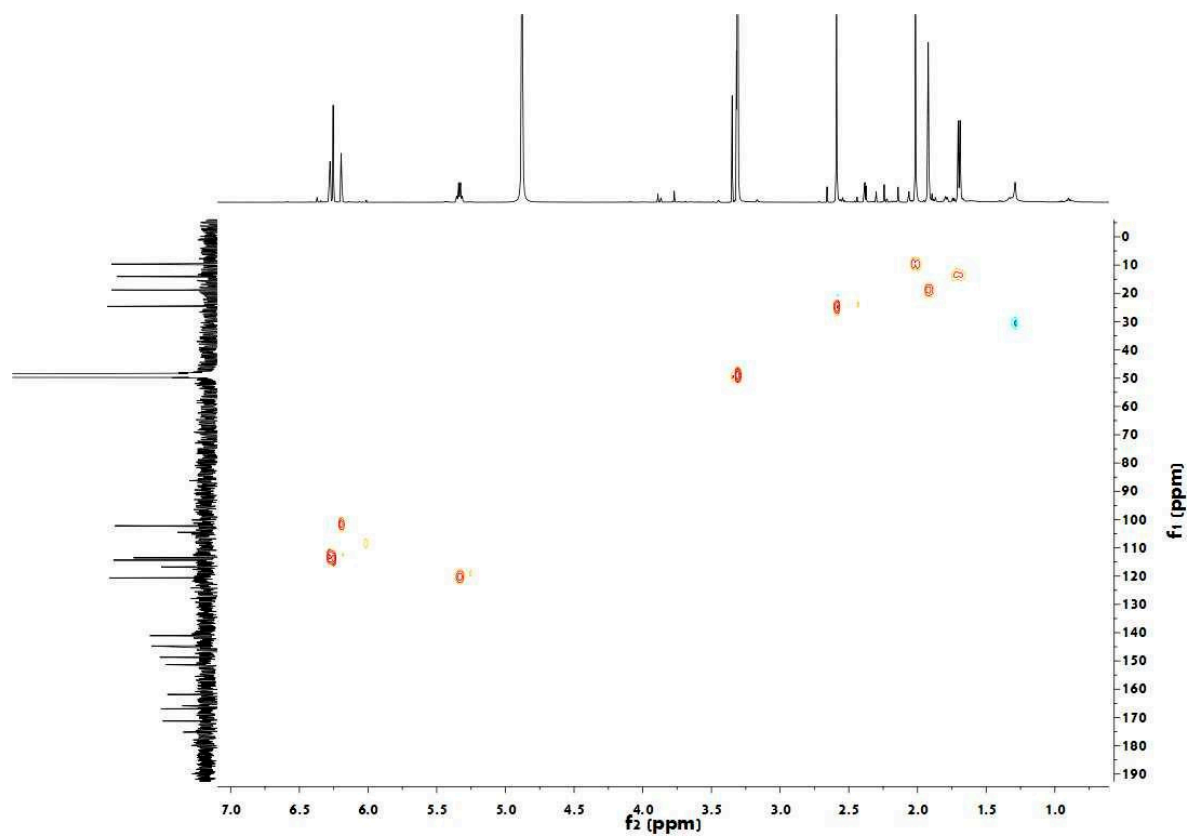

Figure S4. 500 MHz for HSQC Spectrum of 1 in CD<sub>3</sub>OD.

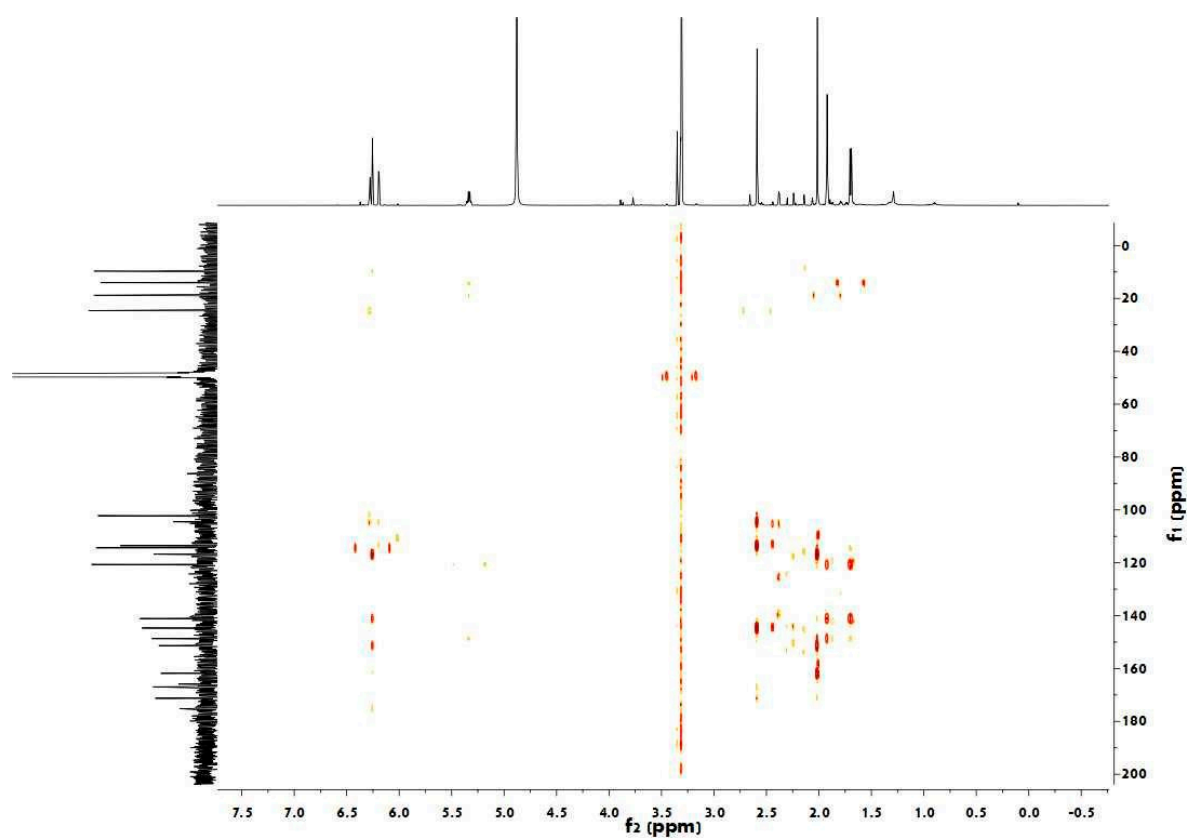

Figure S5. 500 MHz for HMBC Spectrum of 1 in CD<sub>3</sub>OD.

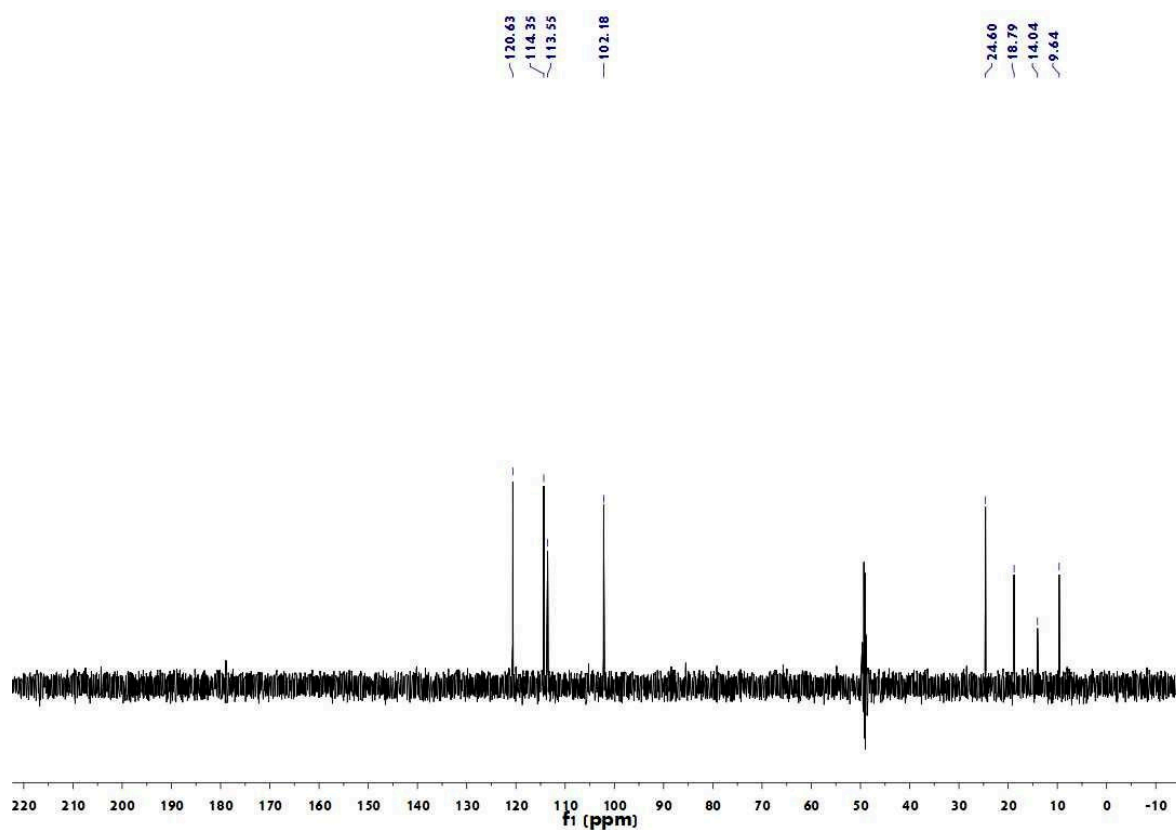

Figure S6. 125 MHz for Dept 135 Spectrum of **1** in CD<sub>3</sub>OD.

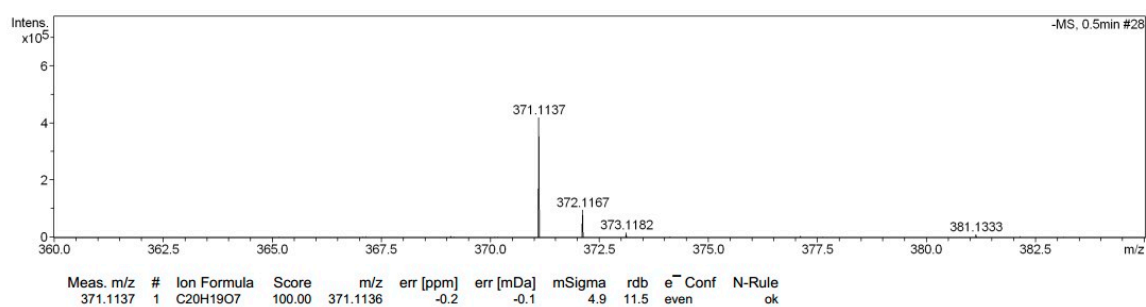

Figure S7. HR-ESI-MS of **1**.
